# Supplementary material
Source: PubMed Central journal article supplement (PMC384766)
Supplement: pnas_101_13_4441__3.pdf [file pnas_101_13_4441__3.pdf]

**Table 3. Relative permeabilities for Na<sup>+</sup> and K<sup>+</sup> ions and yeast growth phenotype of mutant G protein-coupled inwardly rectifying potassium 3.2 (GIRK2) channels**

|               | $\Delta E$         | $P_{\text{Na}}/P_{\text{K}}$ | $N$ | 0.5 K |
|---------------|--------------------|------------------------------|-----|-------|
| S177T         | $-79.35 \pm 1.48$  | $0.047 \pm 0.002$            | 16  | +     |
| S177W         | $-17.85 \pm 0.84$  | $0.5 \pm 0.01$               | 31  | -     |
| S177T (TPN-Q) | $-131.4 \pm 3.66$  | $0.006 \pm 0.0009$           | 4   | ND    |
| Type 1        | $-98.3 \pm 4.29$   | $0.026 \pm 0.005$            | 10  | +     |
| Type 1a       | $-107.74 \pm 4.81$ | $0.018 \pm 0.003$            | 11  | +     |
| Type 2        | $-96.67 \pm 4.55$  | $0.026 \pm 0.005$            | 7   | +     |
| Type 3        | $-87.5 \pm 4.77$   | $0.039 \pm 0.006$            | 10  | +     |
| S177T*        | $-103.48 \pm 5.81$ | $0.023 \pm 0.004$            | 8   | +     |
| S177W*        | $-21.21 \pm 1.09$  | $0.52 \pm 0.02$              | 18  | -     |
| Y102N-S177W*  | $-89.1 \pm 2.03$   | $0.032 \pm 0.002$            | 11  | +     |
| F147Y-S177W*  | $-77.73 \pm 2.14$  | $0.05 \pm 0.004$             | 11  | -     |
| N184D-S177W*  | $-77.85 \pm 3.02$  | $0.051 \pm 0.005$            | 8   | +     |
| N94I-S177W*   | $-57.76 \pm 5.10$  | $0.12 \pm 0.02$              | 6   | -     |
| N94Y-S177W    | $-51.3 \pm 1.8$    | $0.14 \pm 0.009$             | 26  | +     |
| N94Y-S177W*   | $-43.72 \pm 1.22$  | $0.18 \pm 0.008$             | 8   | +     |
| F98I-S177W*   | $-54.76 \pm 5.48$  | $0.14 \pm 0.03$              | 9   | -     |
| F98Y-S177W*   | $-49.1 \pm 3.06$   | $0.15 \pm 0.01$              | 4   | -     |
| M123L-S177W*  | $-31.98 \pm 1.26$  | $0.34 \pm 0.01$              | 9   | -     |
| S177W-D346N*  | $-24.1 \pm 0.01$   | $0.39 \pm 0.01$              | 3   | -     |
| S177W-Y336H*  | $-23.24 \pm 1.26$  | $0.40 \pm 0.01$              | 7   | -     |
| P26L-S177W*   | $-21.6 \pm 1.11$   | $0.43 \pm 0.02$              | 6   | -     |
| M19T-S177W*   | $-21.1 \pm 1.51$   | $0.44 \pm 0.02$              | 7   | -     |

|                      | $\Delta E$        | $P_{\text{Na}}/P_{\text{K}}$ | $N$ | 0.5 K |
|----------------------|-------------------|------------------------------|-----|-------|
| T136I–S177W*         | $-22.67 \pm 1.58$ | $0.49 \pm 0.03$              | 6   | –     |
| S177W–N263S*         | $-22.35 \pm 2.23$ | $0.50 \pm 0.04$              | 8   | –     |
| S177W–K219R*         | $-21.6 \pm 2.1$   | $0.52 \pm 0.04$              | 8   | –     |
| S177W–T80P*          | ND                | ND                           | 4   | –     |
| <i>Weaver</i>        | $-7.8 \pm 2$      | $0.64 \pm 0.04$              | 10  | –     |
| N94Y- <i>weaver</i>  | $-7.4 \pm 1.8$    | $0.65 \pm 0.04$              | 9   | –     |
| N94F- <i>weaver</i>  | $-7.85 \pm 0.84$  | $0.74 \pm 0.02$              | 8   | –     |
| F98Y- <i>weaver</i>  | $-12.6 \pm 2.39$  | $0.54 \pm 0.04$              | 9   | –     |
| Y102N- <i>weaver</i> | $-8.3 \pm 3.2$    | $0.64 \pm 0.06$              | 6   | –     |
| F147Y- <i>weaver</i> | $-11.62 \pm 3.45$ | $0.58 \pm 0.07$              | 8   | –     |
| N184D- <i>weaver</i> | $-8.62 \pm 3.17$  | $0.64 \pm 0.06$              | 8   | –     |
| N94F–S177W           | $-47.48 \pm 4$    | $0.19 \pm 0.03$              | 19  | +     |
| N94F–S177W*          | $-51.72 \pm 1.49$ | $0.13 \pm 0.008$             | 8   | +     |
| N94H–S177W           | $-40.9 \pm 3.37$  | $0.22 \pm 0.03$              | 10  | +     |
| N94M–S177W           | $-21.56 \pm 2.9$  | $0.45 \pm 0.04$              | 6   | –     |
| N94D–S177W           | $-22.35 \pm 3.3$  | $0.45 \pm 0.05$              | 10  | –     |

The difference in reversal potential ( $\Delta E_{\text{rev}}$ ) that occurred with 90 mM Na<sup>+</sup> and 90 mM K<sup>+</sup> solutions was measured from the averaged current–voltage relations obtained from recording *Xenopus* oocytes expressing GIRK2 channels and corrected for junction potential (4 mV). The relative permeability ratios ( $P_{\text{Na}}/P_{\text{K}}$ ) then were deduced by using a form of the Goldman–Hodgkin–Katz equation. For tertiapin, currents were obtained in Na<sup>+</sup> and K<sup>+</sup> before and after addition of 1  $\mu\text{M}$  blocking peptide, and the difference current was used to determine the reversal potential. When current was indistinguishable from leak,  $P_{\text{Na}}/P_{\text{K}}$  could not be determined (indicated as ND).  $N$  indicates number of oocytes. Yeast growth phenotype was deduced from low-potassium concentration plate (0.5 mM KCl).
