# Supplementary material
Source: PubMed Central journal article supplement (PMC384766)

**A**

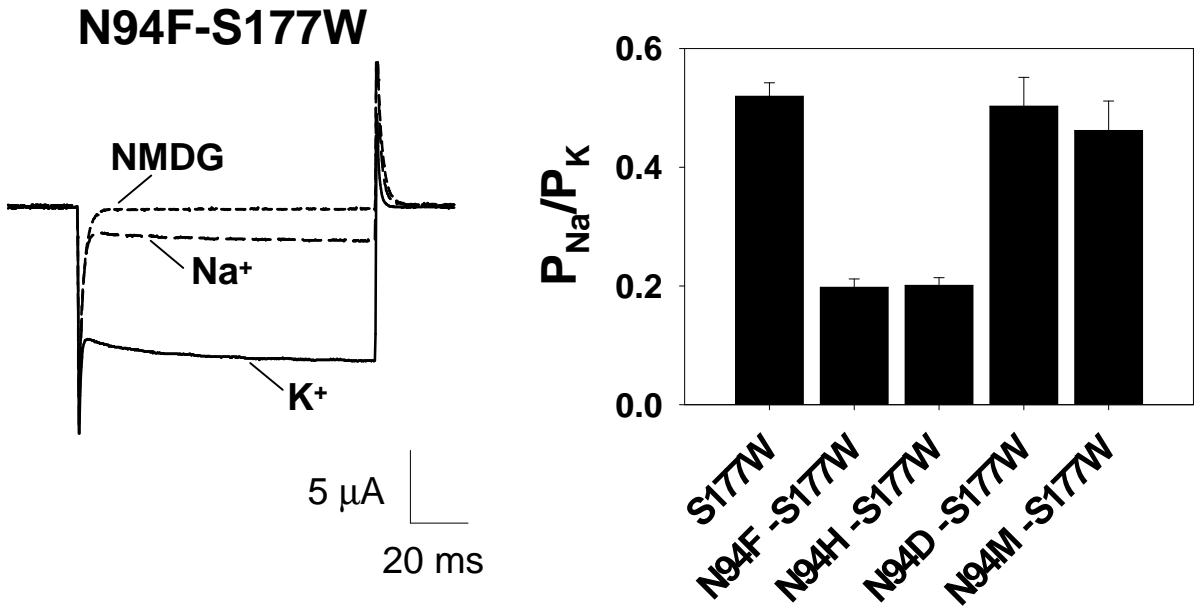

**B**

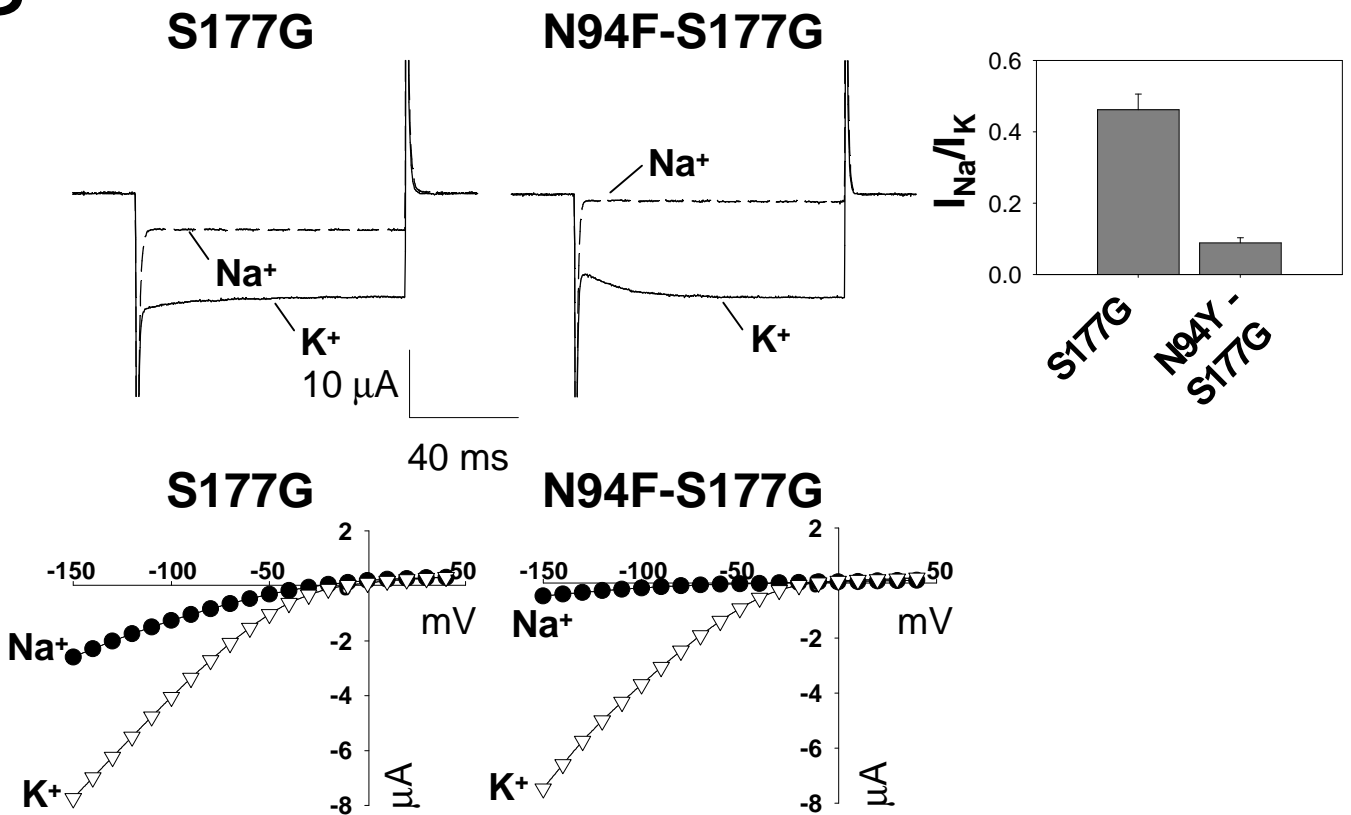

**C**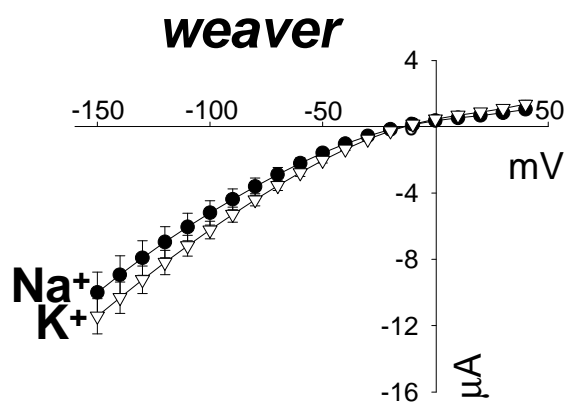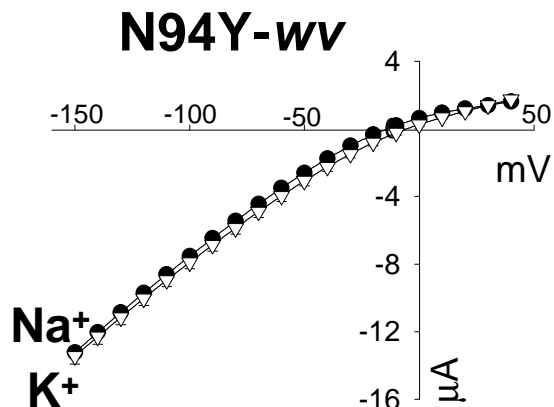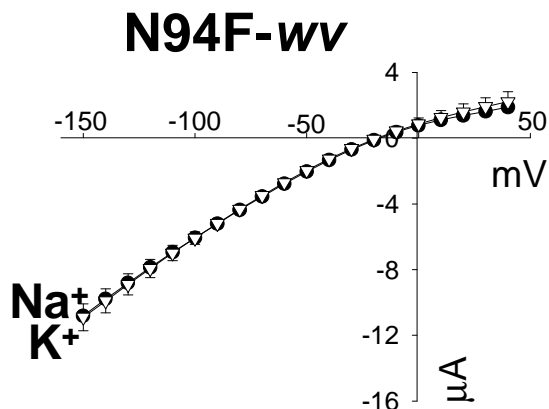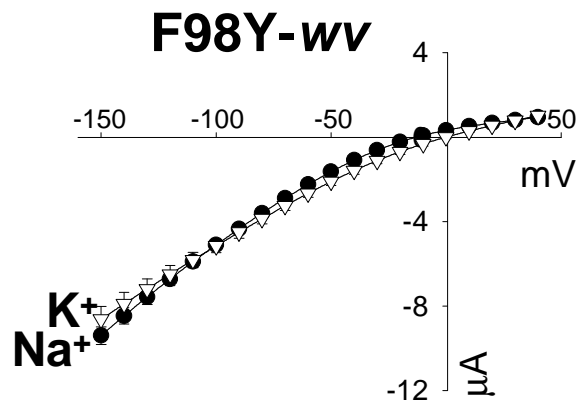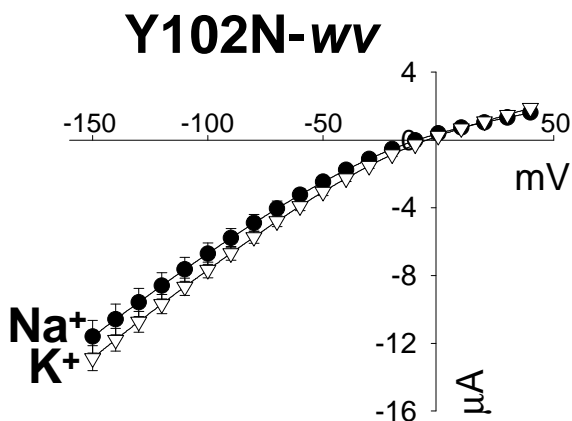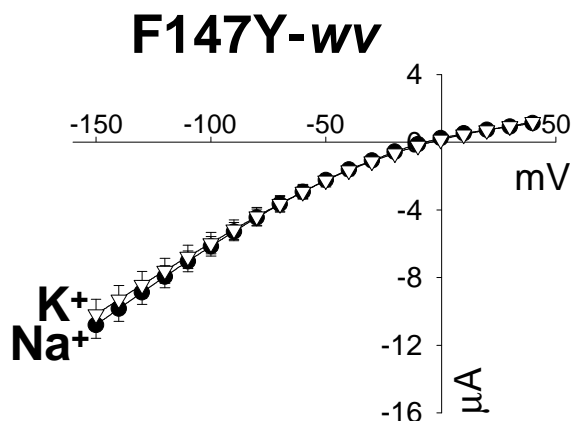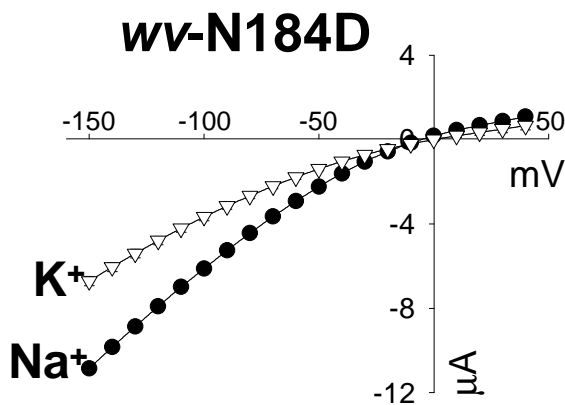

D

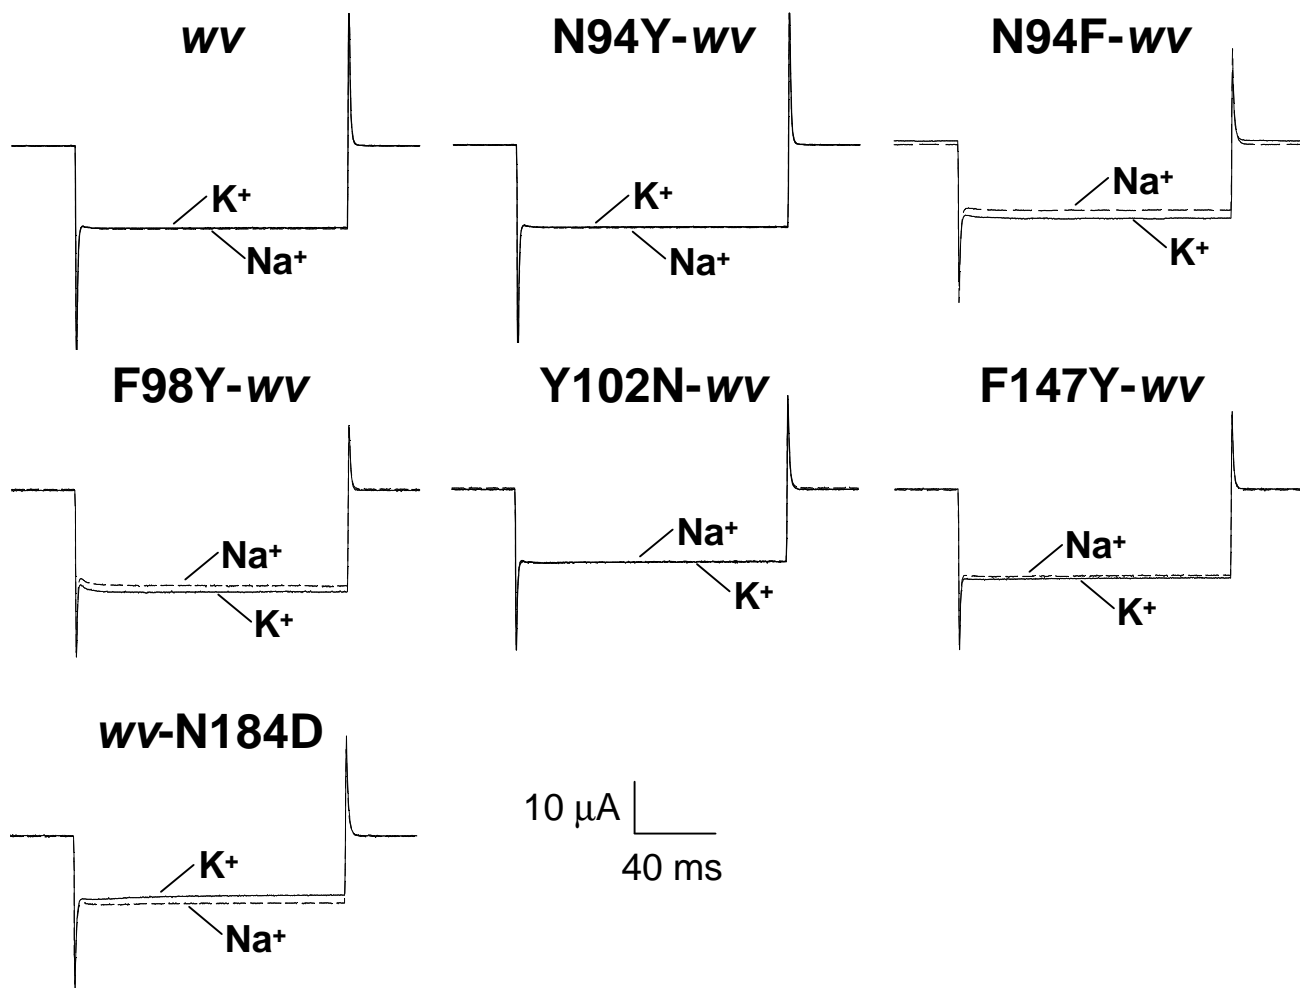

E

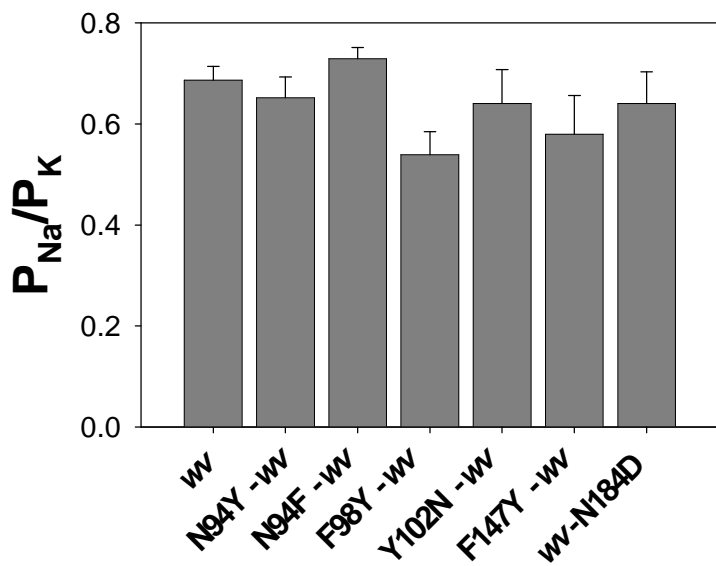

Supplement: pnas_101_13_4441__11.pdf [file pnas_101_13_4441__11.pdf]

**S177T**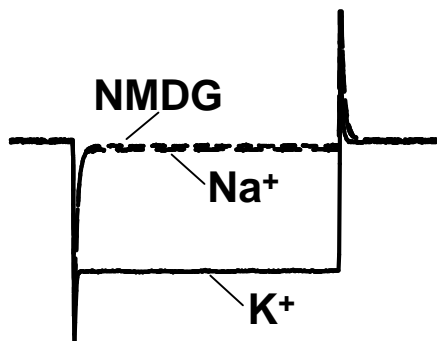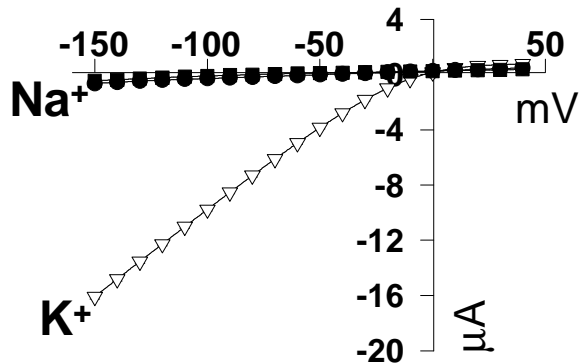**S177W**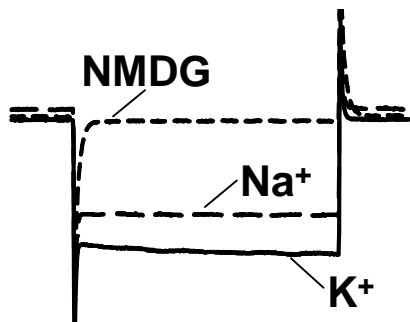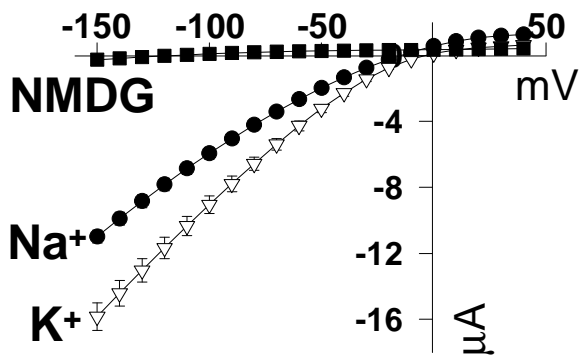**GIRK2**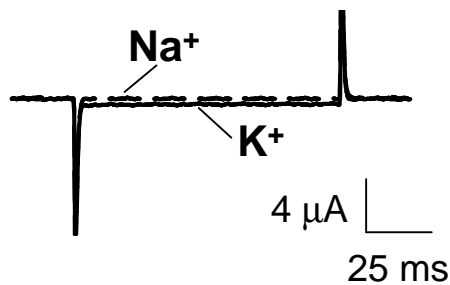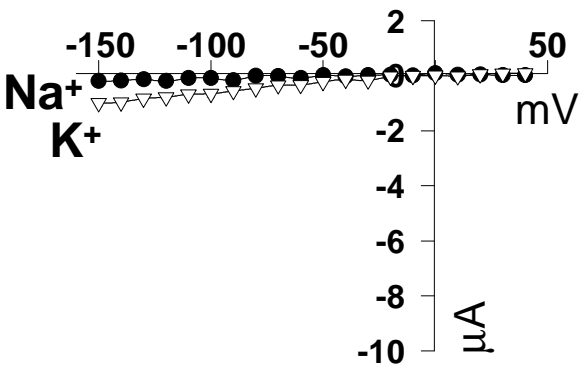

Supplement: pnas_101_13_4441__2.pdf [file pnas_101_13_4441__2.pdf]

**A**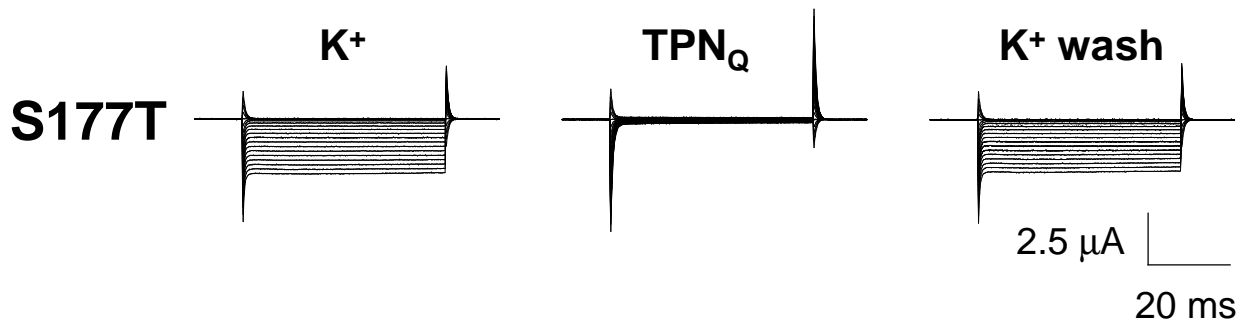**B**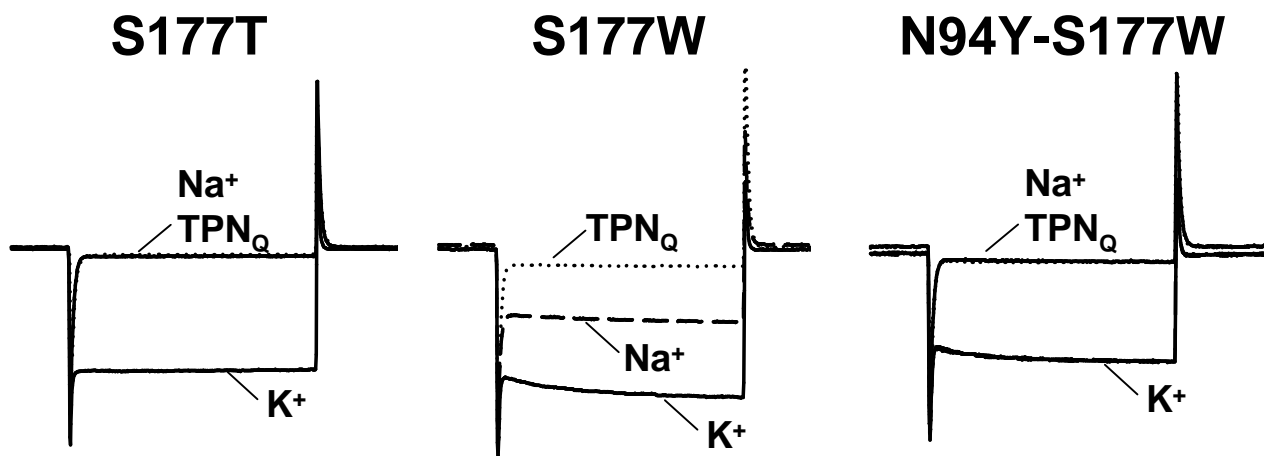**C**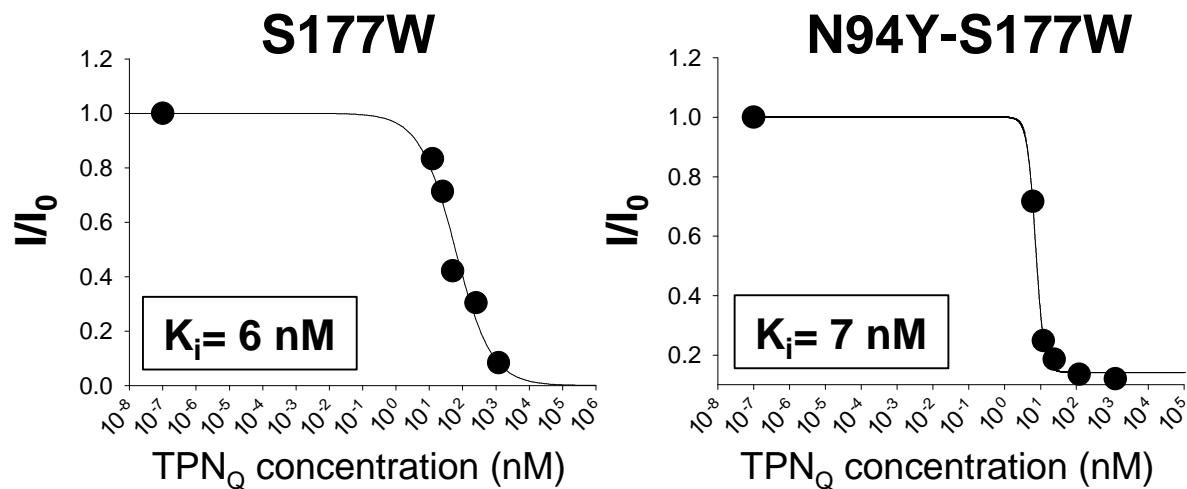

Supplement: pnas_101_13_4441__5.pdf [file pnas_101_13_4441__5.pdf]

# S177W

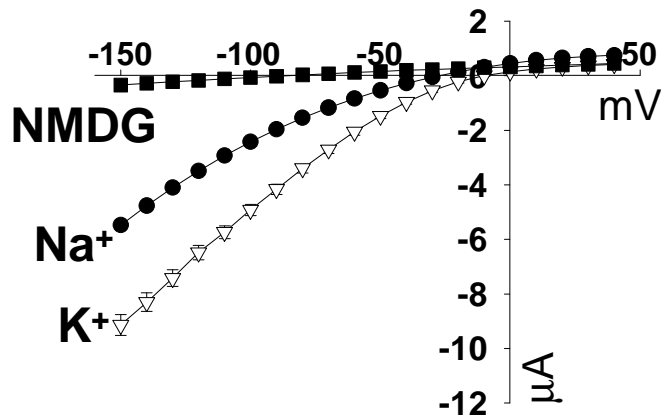

# Type 1

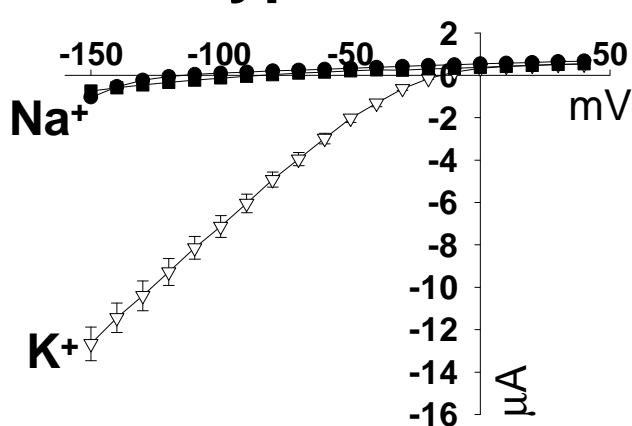

# Type 2

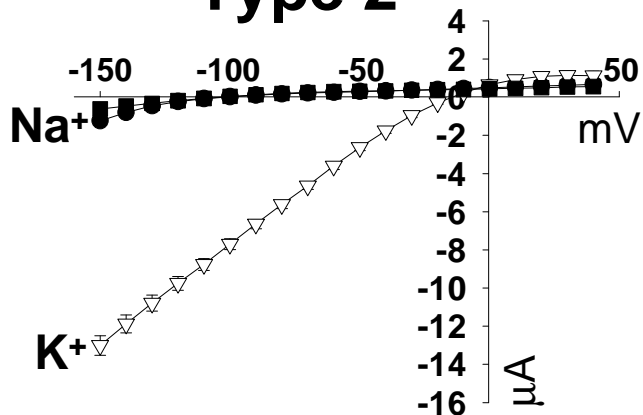

# Type 3

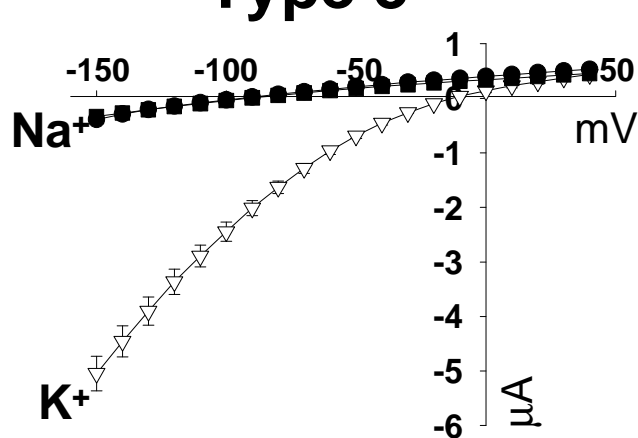

Supplement: pnas_101_13_4441__7.pdf [file pnas_101_13_4441__7.pdf]

**A**

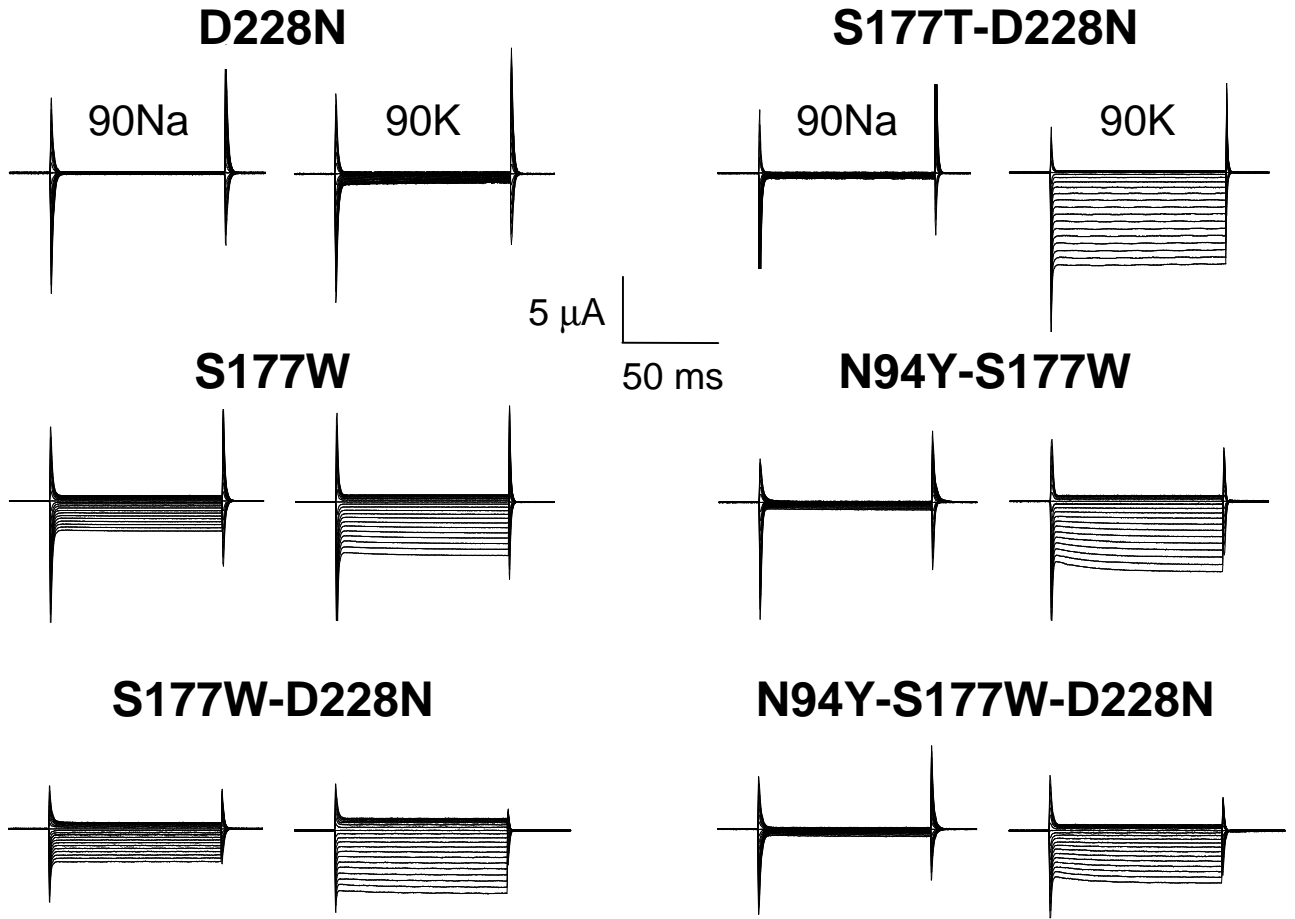

**B**

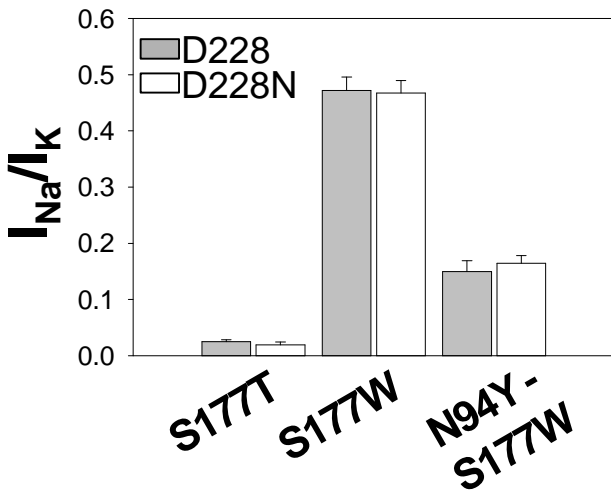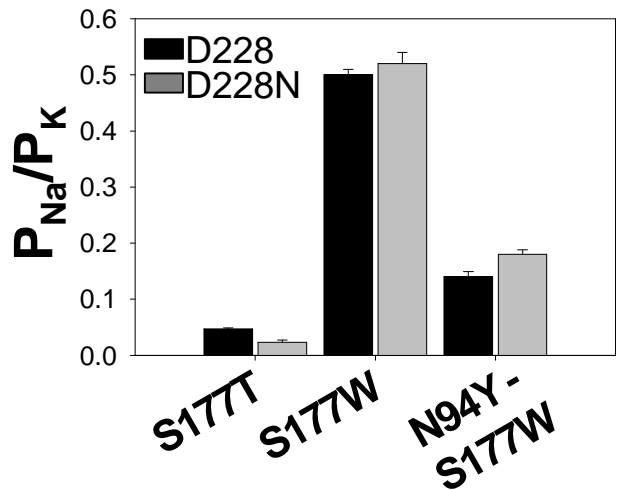

C

**D228N**

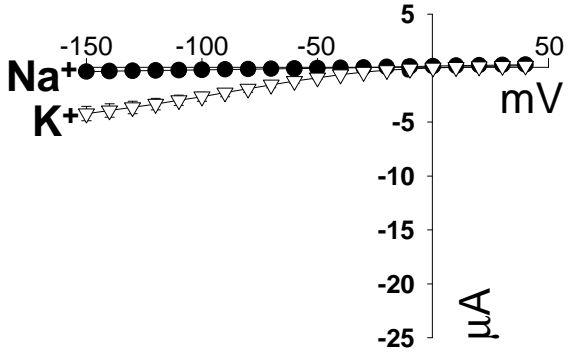

**S177T-D228N**

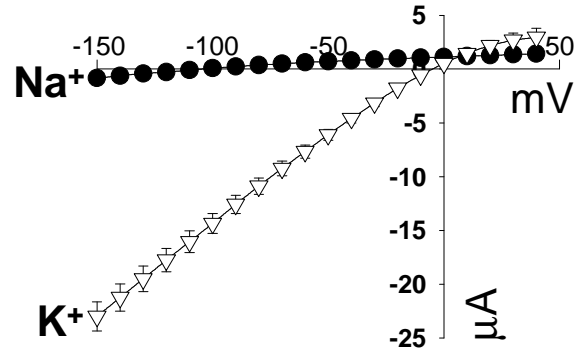

**S177W**

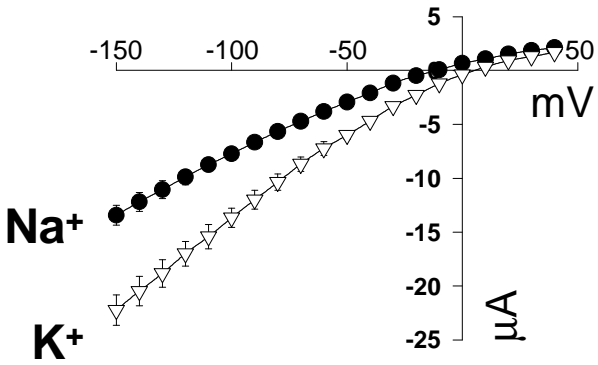

**S177W-D228N**

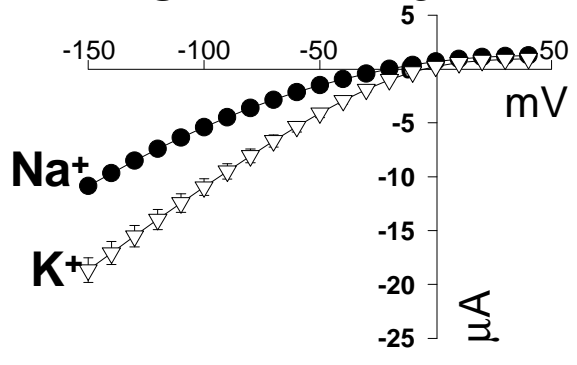

**N94Y-S177W**

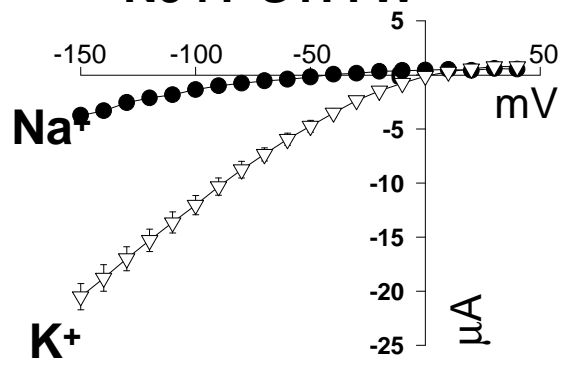

**N94Y-S177W-D228N**

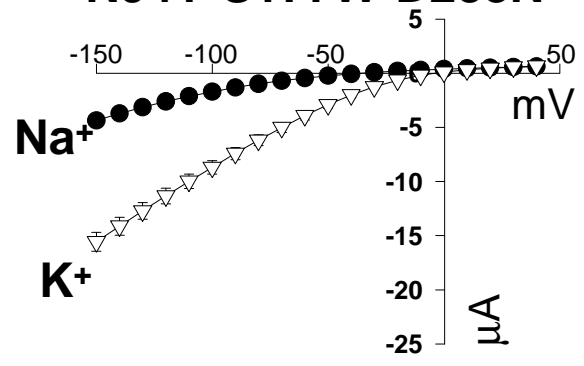

Supplement: pnas_101_13_4441__9.pdf [file pnas_101_13_4441__9.pdf]
